# Supplementary material for: Low Level of Colistin Resistance and mcr Genes Presence in Salmonella spp.: Evaluation of Isolates Collected between 2000 and 2020 from Animals and Environment
Source: MDPI journal article supplement (doi:10.3390/antibiotics11020272), 2022-02-19
Supplement: s1 [file s1]

## Supplementary Material

# Low Level of Colistin Resistance and mcr Genes Presence in Salmonella spp.: Evaluation of Isolates Collected between 2000 and 2020 from Animals and Environment

**Fabrizio Bertelloni \*, Giulia Cagnoli, Barbara Turchi and Valentina Virginia Ebani**

Department of Veterinary Science, University of Pisa, 56124 Pisa, Italy; g.cagnoli@studenti.unipi.it (G.C.); barbara.turchi@unipi.it (B.T.); valentina.virginia.ebani@unipi.it (V.V.E.)

\* Correspondence: [fabrizio.bertelloni@unipi.it](mailto:fabrizio.bertelloni@unipi.it)

**Table S1.** Detailed information about analyzed *Salmonella* isolates.

[illegible]









|      |                          |                                         |           |    |      |       |   |   |   |   |   |   |   |   |   |
|------|--------------------------|-----------------------------------------|-----------|----|------|-------|---|---|---|---|---|---|---|---|---|
| S369 | <i>enterica</i>          | Kisarawe                                | Housefly  | O* | 2019 | ≤ 0.5 | - | - | - | - | - | - | - | - | - |
| S370 | <i>enterica</i>          | Kentucky                                | Housefly  | O* | 2019 | ≤ 0.5 | - | - | - | - | - | - | - | - | - |
| S372 | <i>enterica</i>          | Kentucky                                | Housefly  | O* | 2019 | ≤ 0.5 | - | - | - | - | - | - | - | - | - |
| S373 |                          | R fase                                  | Housefly  | O* | 2019 | 2     | - | - | - | - | - | - | - | - | - |
| S374 | <i>enterica</i>          | Napoli                                  | Housefly  | O* | 2019 | 4     | - | + | - | + | - | - | - | - | - |
| S375 |                          | R fase                                  | Housefly  | O* | 2019 | 4     | - | - | - | + | - | - | - | - | - |
| S377 | <i>enterica</i>          | Napoli                                  | Housefly  | O* | 2019 | 2     | - | - | - | - | - | - | - | - | - |
| S378 |                          | R fase                                  | Housefly  | O* | 2019 | 4     | - | - | - | + | - | - | - | - | - |
| S381 | <i>diarizonae (IIIb)</i> | 50:r:1,5,7                              | Wild Boar | O* | 2019 | 2     | - | - | - | - | - | - | - | - | - |
| S383 |                          | R fase                                  | Wild Boar | S  | 2019 | ≤ 0.5 | - | - | - | - | - | - | - | - | - |
| S385 | <i>enterica</i>          | Napoli                                  | Wild Boar | S  | 2019 | 2     | - | - | - | - | - | - | - | - | - |
| S386 | <i>diarizonae (IIIb)</i> | 50:r:1,5,7                              | Wild Boar | S  | 2019 | > 256 | + | - | - | - | - | - | - | - | - |
| S387 | <i>enterica</i>          | Rubislaw                                | Wild Boar | O  | 2019 | ≤ 0.5 | - | - | - | - | - | - | - | - | - |
| S389 | <i>enterica</i>          | Toulon                                  | Wild Boar | S  | 2019 | 1     | - | - | - | - | - | - | - | - | - |
| S390 | <i>enterica</i>          | Kottbus                                 | Wild Boar | S  | 2019 | 2     | - | - | - | - | - | - | - | - | - |
| S391 | <i>houtenae (IV)</i>     | 1,40:z <sub>4</sub> ,z <sub>23</sub> :- | Wild Boar | S  | 2020 | 2     | - | - | - | - | - | - | - | - | - |
| S392 | <i>houtenae (IV)</i>     | 1,40:z <sub>4</sub> ,z <sub>23</sub> :- | Wild Boar | S  | 2020 | ≤ 0.5 | - | - | - | - | - | - | - | - | - |
| S394 | <i>houtenae (IV)</i>     | 1,40:z <sub>4</sub> ,z <sub>23</sub> :- | Wild Boar | O  | 2020 | ≤ 0.5 | - | - | - | - | - | - | - | - | - |
| S395 | <i>enterica</i>          | Infantis                                | Dog       | S  | 2020 | ≤ 0.5 | - | - | - | - | - | - | - | - | - |
| R12  | <i>enterica</i>          | Ceyco                                   | Reptile   | S  | 2001 | 1     | - | - | - | - | - | - | - | - | - |
| R17  | <i>enterica</i>          | Muenchen                                | Reptile   | S  | 2001 | 1     | - | - | - | - | - | - | - | - | - |
| R25  | <i>enterica</i>          | Kapemba                                 | Reptile   | S  | 2001 | ≤ 0.5 | - | - | - | - | - | - | - | - | - |
| R30  | <i>enterica</i>          | Friedrichsfelde                         | Reptile   | S  | 2001 | 2     | - | - | - | - | - | - | - | - | - |
| R32  | <i>enterica</i>          | Midway                                  | Reptile   | S  | 2001 | 2     | - | - | - | - | - | - | - | - | - |
| R39  | <i>enterica</i>          | Trimndon                                | Reptile   | S  | 2002 | 1     | - | - | - | - | - | - | - | - | - |
| R40  | <i>salamae (II)</i>      | 9,46:z <sub>39</sub> :1,7               | Reptile   | S  | 2002 | 2     | - | - | - | - | - | - | - | - | - |
| R43  | <i>enterica</i>          | Trimndon                                | Reptile   | S  | 2002 | ≤ 0.5 | - | - | - | - | - | + | - | - | - |
| R45  | <i>enterica</i>          | Caracas                                 | Reptile   | S  | 2002 | 2     | - | - | - | - | - | - | - | - | - |
| R63  | <i>enterica</i>          | Berta                                   | Reptile   | S  | 2002 | ≤ 0.5 | - | - | - | - | - | - | - | - | - |
| R90  | <i>enterica</i>          | Berta                                   | Reptile   | S  | 2002 | ≤ 0.5 | - | - | - | - | - | - | - | - | - |
| R91  | <i>enterica</i>          | Berta                                   | Reptile   | S  | 2002 | ≤ 0.5 | - | - | - | - | - | - | - | - | - |
| R92  | <i>enterica</i>          | Berta                                   | Reptile   | S  | 2002 | ≤ 0.5 | - | - | - | - | - | - | - | - | - |
| R108 | <i>enterica</i>          | Memphis                                 | Reptile   | S  | 2002 | ≤ 0.5 | - | + | - | - | - | - | - | - | - |

|      |                          |                                        |         |   |      |       |   |   |   |   |   |   |   |   |   |
|------|--------------------------|----------------------------------------|---------|---|------|-------|---|---|---|---|---|---|---|---|---|
| R120 | <i>enterica</i>          | Senftenberg                            | Reptile | S | 2002 | ≤ 0.5 | - | - | - | - | - | - | - | - | - |
| R164 | <i>houtenae (IV)</i>     | 44:z <sub>4</sub> ,z <sub>23</sub> :-  | Reptile | S | 2002 | 2     | - | - | - | - | - | - | - | + | - |
| R161 | <i>houtenae (IV)</i>     | 44:z <sub>4</sub> ,z <sub>23</sub> :-  | Reptile | S | 2002 | 2     | - | + | - | - | - | - | - | - | - |
| R154 | <i>houtenae (IV)</i>     | 44:z <sub>4</sub> ,z <sub>23</sub> :-  | Reptile | S | 2002 | 256   | - | - | - | - | - | - | - | - | - |
| R152 | <i>enterica</i>          | Berta                                  | Reptile | S | 2002 | ≤ 0.5 | - | - | - | - | - | - | - | - | - |
| R133 | <i>enterica</i>          | Montevideo                             | Reptile | S | 2002 | ≤ 0.5 | - | - | - | - | - | - | - | - | - |
| R138 | <i>enterica</i>          | Kottbus                                | Reptile | S | 2002 | 1     | - | - | - | - | - | - | - | - | - |
| R144 | <i>enterica</i>          | Berta                                  | Reptile | S | 2002 | ≤ 0.5 | - | - | - | - | - | - | - | - | - |
| R148 | <i>enterica</i>          | Berta                                  | Reptile | S | 2002 | ≤ 0.5 | - | - | - | - | - | - | - | - | - |
| R140 | <i>enterica</i>          | Montevideo                             | Reptile | S | 2002 | 1     | - | - | - | - | - | - | - | - | - |
| R139 | <i>enterica</i>          | Chichiri                               | Reptile | S | 2002 | ≤ 0.5 | - | - | - | - | - | - | - | - | - |
| R173 | <i>enterica</i>          | Senftenberg                            | Reptile | S | 2002 | ≤ 0.5 | - | - | - | - | - | - | - | + | - |
| R121 | <i>houtenae (IV)</i>     | 44:z <sub>4</sub> ,z <sub>23</sub> :-  | Reptile | S | 2002 | 2     | - | - | - | - | - | - | - | - | - |
| R174 | <i>enterica</i>          | Israel                                 | Reptile | S | 2002 | 2     | - | - | - | - | - | - | - | - | - |
| R177 | <i>enterica</i>          | Anatum                                 | Reptile | S | 2002 | 1     | - | - | - | - | - | - | - | - | - |
| R183 | <i>enterica</i>          | Kuntair                                | Reptile | S | 2002 | 1     | - | - | - | - | - | - | - | - | - |
| R193 | <i>enterica</i>          | Durban                                 | Reptile | S | 2002 | 2     | - | - | - | - | - | - | - | - | - |
| R198 | <i>enterica</i>          | Berta                                  | Reptile | S | 2002 | ≤ 0.5 | - | - | - | - | - | - | - | - | - |
| R199 | <i>enterica</i>          | Berta                                  | Reptile | S | 2002 | ≤ 0.5 | - | - | - | - | - | - | - | - | - |
| R213 | <i>enterica</i>          | Agona                                  | Reptile | S | 2002 | 4     | - | - | - | - | - | - | - | - | - |
| R221 | <i>diarizonae (IIIb)</i> | 50:r:e,n,x,z <sub>15</sub>             | Reptile | S | 2002 | ≤ 0.5 | - | - | - | - | - | - | - | - | - |
| R222 | <i>houtenae (IV)</i>     | 44:z <sub>4</sub> ,z <sub>23</sub> :-  | Reptile | S | 2002 | 2     | - | - | - | - | - | - | - | - | - |
| R226 | <i>houtenae (IV)</i>     | 44:z <sub>4</sub> ,z <sub>23</sub> :-  | Reptile | S | 2002 | 2     | - | - | - | - | - | - | - | - | - |
| R245 | <i>enterica</i>          | Othmarschen                            | Reptile | S | 2002 | 2     | - | - | - | - | - | - | - | - | - |
| R248 | <i>enterica</i>          | Othmarschen                            | Reptile | S | 2002 | 1     | - | - | - | - | - | - | - | - | - |
| R261 | <i>enterica</i>          | Midway                                 | Reptile | S | 2002 | 4     | - | - | - | - | - | - | - | - | - |
| R263 | <i>enterica</i>          | Reading                                | Reptile | S | 2002 | 1     | - | - | - | - | - | - | - | - | - |
| R294 | <i>enterica</i>          | Caracas                                | Reptile | S | 2002 | 1     | - | - | - | - | - | - | - | - | - |
| R300 | <i>diarizonae (IIIb)</i> | 50:z:z <sub>52</sub>                   | Reptile | S | 2002 | 1     | + | - | - | + | - | - | - | - | - |
| R278 | <i>enterica</i>          | Veneziana                              | Reptile | S | 2002 | 2     | - | - | - | - | - | - | - | - | - |
| R102 | <i>salamae (II)</i>      | 48:d:z <sub>6</sub>                    | Reptile | S | 2002 | 2     | - | - | - | - | - | - | - | - | - |
| R123 | <i>houtenae (IV)</i>     | 44:z <sub>4</sub> ,z <sub>23</sub> :-  | Reptile | S | 2002 | 1     | - | - | - | - | - | - | - | - | - |
| R112 | <i>houtenae (IV)</i>     | 18:z <sub>36</sub> ,z <sub>23</sub> :- | Reptile | S | 2002 | ≤ 0.5 | - | + | - | - | - | - | - | - | - |

|      |                          |                                       |           |   |      |       |   |   |   |   |   |   |   |   |   |
|------|--------------------------|---------------------------------------|-----------|---|------|-------|---|---|---|---|---|---|---|---|---|
| R86  | <i>enterica</i>          | Blukwa                                | Reptile   | S | 2002 | ≤ 0.5 | - | - | - | - | - | - | - | - | - |
| R126 | <i>diarizonae (IIIb)</i> | 48:z <sub>4</sub> ,z <sub>23</sub> :- | Reptile   | S | 2002 | 2     | - | + | - | - | - | - | - | - | - |
| R52  | <i>enterica</i>          | Apapa                                 | Reptile   | S | 2002 | ≤ 0.5 | - | - | - | - | - | - | - | - | - |
| R99  | <i>enterica</i>          | Apapa                                 | Reptile   | S | 2002 | ≤ 0.5 | - | - | - | - | - | - | - | - | - |
| R103 | <i>enterica</i>          | Apapa                                 | Reptile   | S | 2002 | ≤ 0.5 | - | - | - | - | - | - | - | - | - |
| R296 | <i>diarizonae (IIIb)</i> | 50:b:z <sub>6</sub>                   | Reptile   | S | 2002 | ≤ 0.5 | - | - | - | - | - | - | - | - | - |
| R114 | <i>salamae (II)</i>      | 16:g,m,s,t:-                          | Reptile   | S | 2002 | ≤ 0.5 | - | - | - | - | - | - | - | - | - |
| R274 | <i>enterica</i>          | Fluntern                              | Reptile   | S | 2002 | ≤ 0.5 | - | - | - | - | - | - | - | - | - |
| R279 | <i>enterica</i>          | Fluntern                              | Reptile   | S | 2002 | 1     | - | - | - | - | - | - | - | - | - |
| R291 | <i>enterica</i>          | Ebrie                                 | Reptile   | S | 2002 | 1     | - | - | - | - | - | - | - | - | - |
| R142 | <i>enterica</i>          | Duval                                 | Reptile   | S | 2002 | 1     | - | - | - | - | - | - | - | - | - |
| R237 | <i>enterica</i>          | Ebrie                                 | Reptile   | S | 2002 | ≤ 0.5 | - | - | - | - | - | - | - | - | - |
| R210 | <i>enterica</i>          | Ebrie                                 | Reptile   | S | 2002 | 2     | - | - | - | - | - | - | - | - | - |
| R282 | <i>salamae (II)</i>      | 50:b:z <sub>6</sub>                   | Reptile   | S | 2002 | ≤ 0.5 | - | - | - | - | - | - | - | - | - |
| R299 | <i>salamae (II)</i>      | 50:b:z <sub>6</sub>                   | Reptile   | S | 2002 | 2     | - | - | - | - | - | - | - | - | - |
| R182 | <i>enterica</i>          | Fluntern                              | Reptile   | S | 2002 | ≤ 0.5 | - | - | - | - | - | - | - | - | - |
| R137 | <i>enterica</i>          | Trimndon                              | Reptile   | S | 2002 | 1     | - | - | - | - | - | - | - | - | - |
| S257 | <i>enterica</i>          | Typhimurium                           | Pigeon    | O | 2014 | ≤ 0.5 | - | - | - | - | - | - | - | - | - |
| S347 | <i>enterica</i>          | London                                | Wild Boar | S | 2018 | ≤ 0.5 | - | - | - | - | - | - | - | - | - |

Legend: TMV = Typhimurium monophasic variant; † = sick animal E = Environment, F = feed, O = Organs, O\* = Entire subject, S = Faeces.
